# Supplementary material
Source: publisher site journal article supplement (https://www.spandidos-publications.com/5429/downloadSupplementary)

Figure S1. Construction and validation of ATOH8-overexpressing HepG2.2.15 cells. (A) Fluorescence imaging of HepG2.2.15-GFP (x10 magnification). (B) Fluorescence imaging of HepG2.2.15-ATOH8 (x10 magnification). (C) Relative mRNA expression levels of ATOH8 in HepG2.2.15 cells. \*\*\*P<0.001..

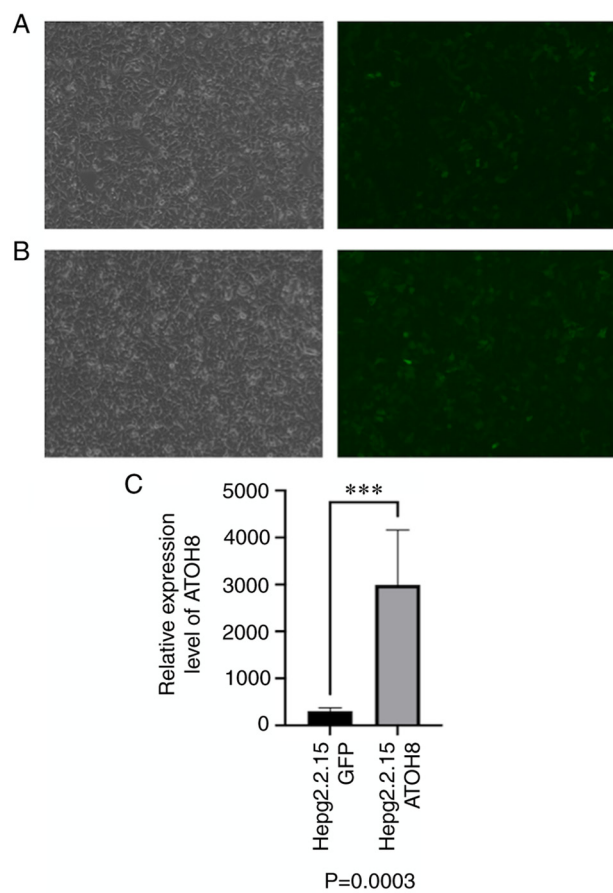

Supplement: Supplementary file 1 [file downloadSupplementary]
